# Supplementary material for: Self-assembled V2O5 nanosheets/reduced graphene oxide hierarchical nanocomposite as a high-performance cathode material for lithium ion batteries
Source: Royal Society of Chemistry journal article supplement (doi:10.1039/c3ta12066j), 2013-01-01
Supplement: c3ta12066j.pdf [file c3ta12066j.pdf]

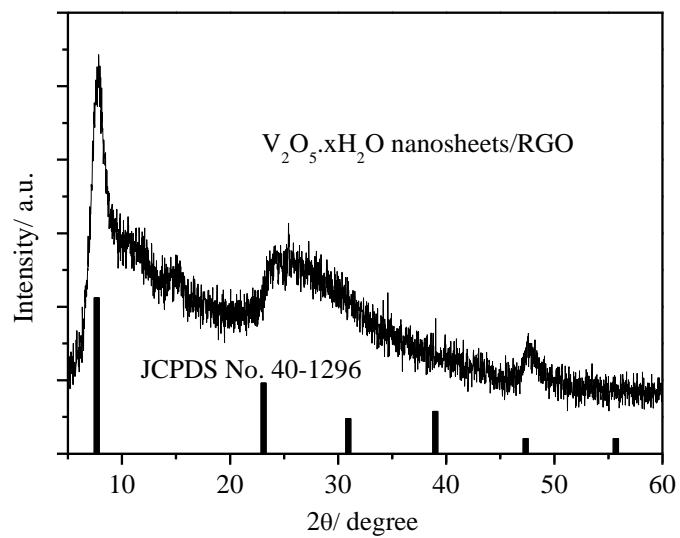

Fig. S1 XRD pattern of the as-prepared  $V_2O_5 \cdot xH_2O$  nanosheets/RGO nanocomposite before annealing

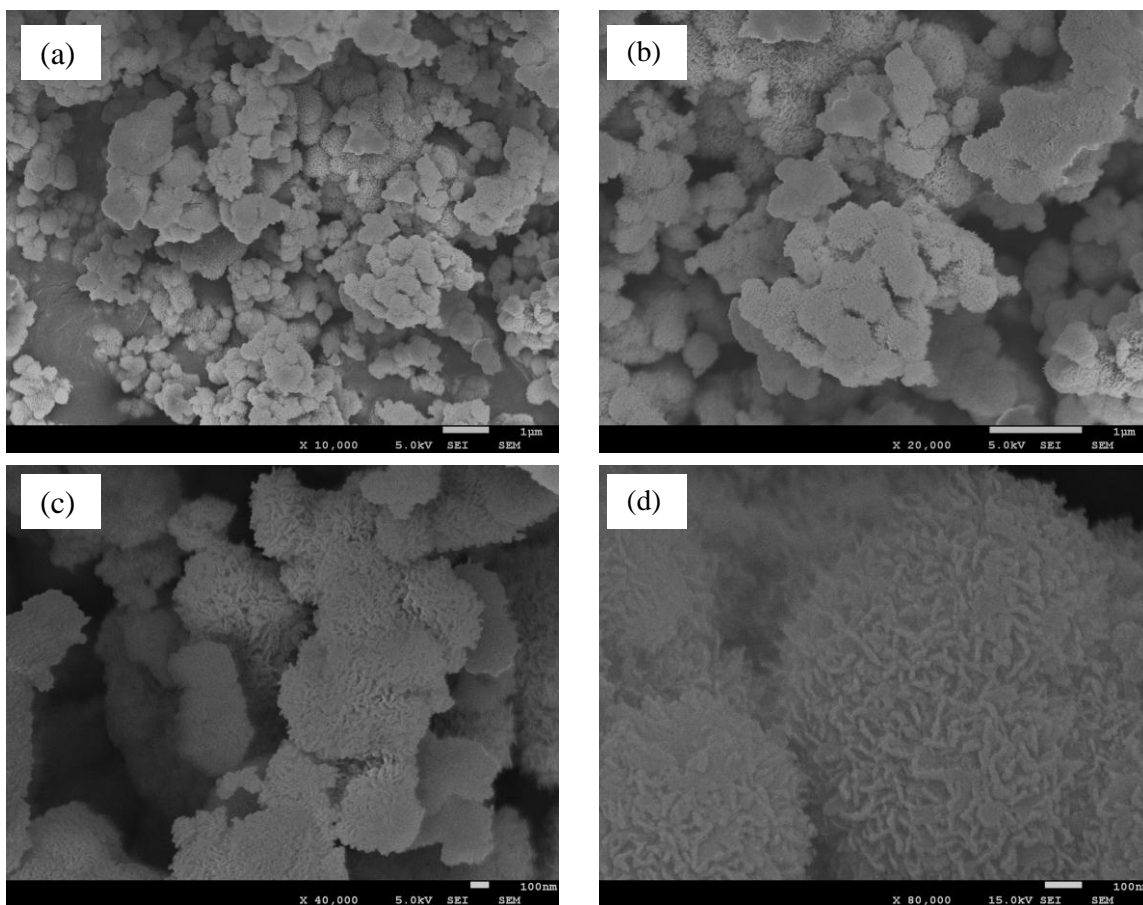

Fig. S2 SEM images of  $V_2O_5$  microspheres at different magnifications

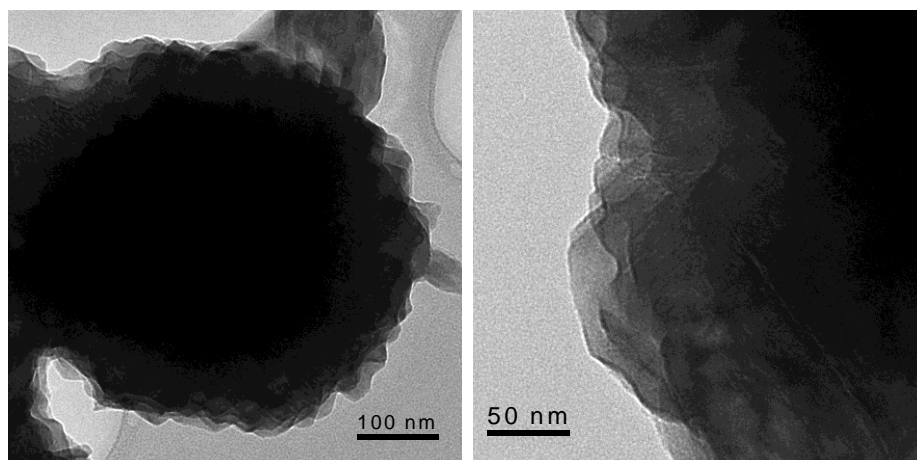

Fig. S3 TEM images of  $V_2O_5$  microspheres at different magnifications

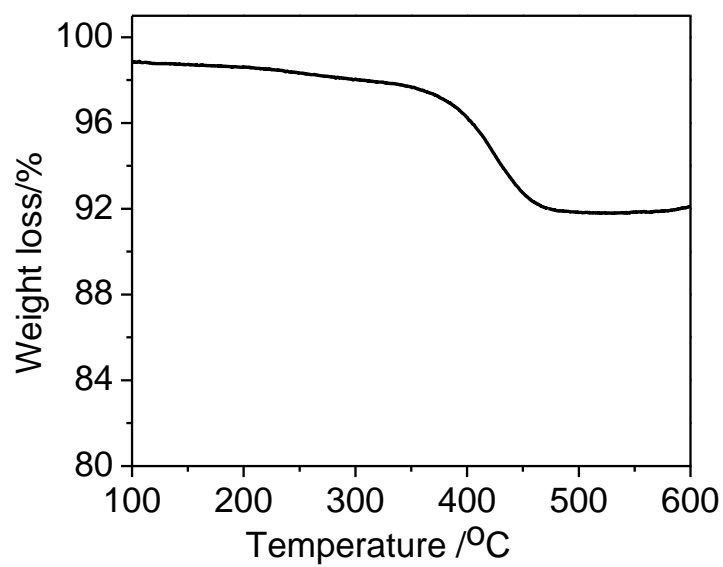

Fig. S4 Thermogravimetric analysis of  $V_2O_5$  nanosheets/RGO nanocomposite

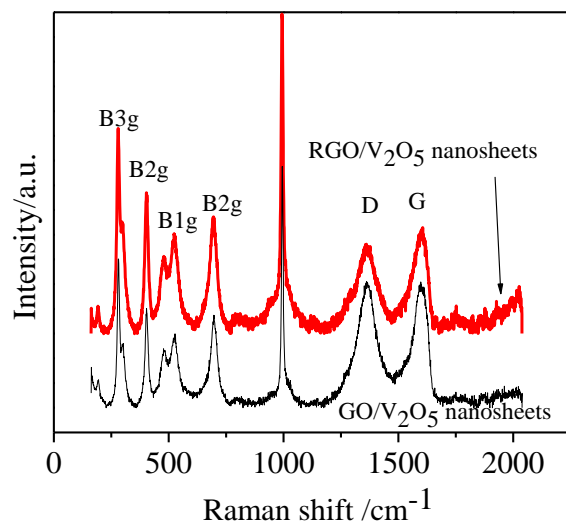

Fig. S5 Raman spectra of V<sub>2</sub>O<sub>5</sub> nanosheets/RGO nanocomposite (red) and V<sub>2</sub>O<sub>5</sub> nanosheets/GO nanocomposite (black)

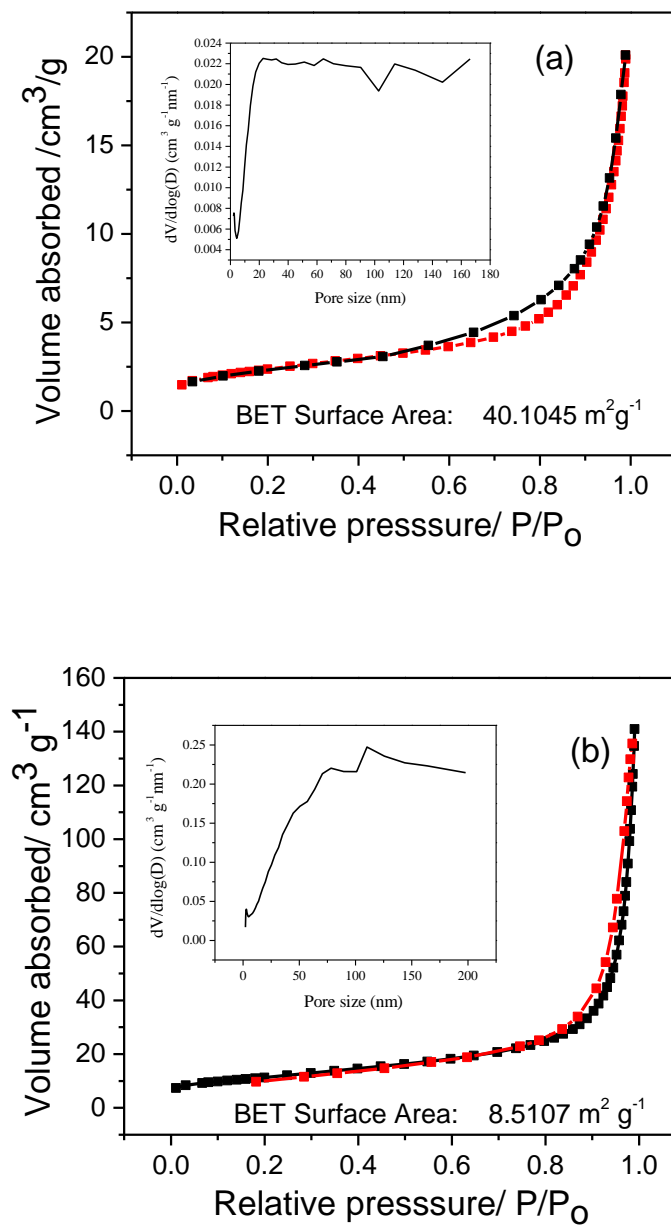

Fig. S6 Nitrogen adsorption and desorption isotherm (the insets show the pore size distribution) of  $\text{V}_2\text{O}_5$  nanosheets/RGO nanocomposite (a) and pure  $\text{V}_2\text{O}_5$  microsphere (b)

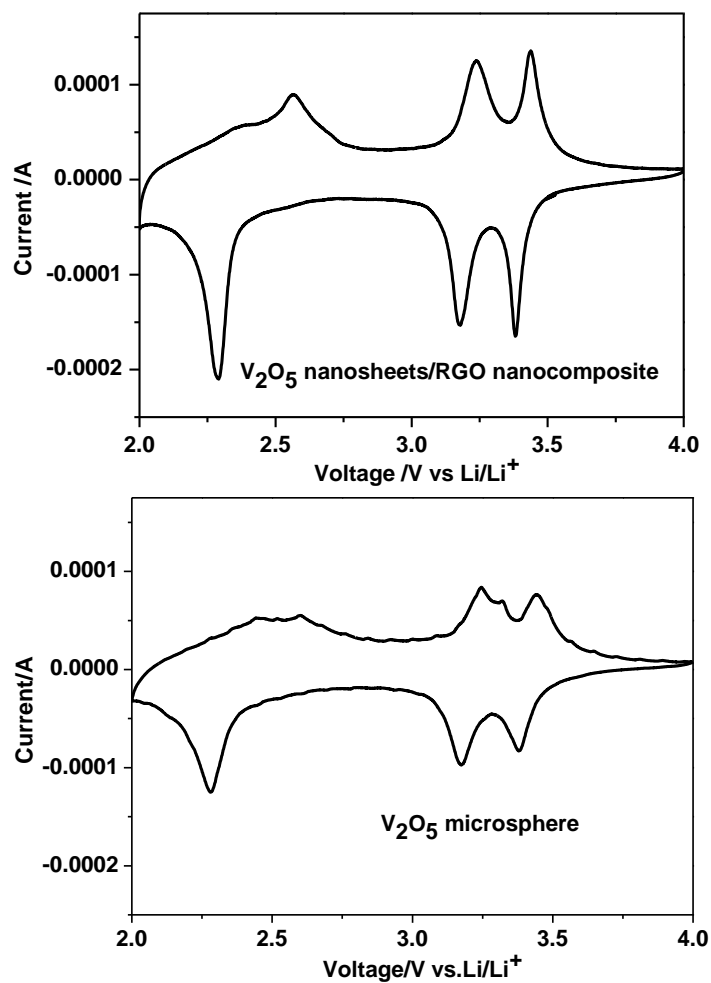

Fig. S7 Cyclic voltammograms of V<sub>2</sub>O<sub>5</sub> nanosheets/RGO nanocomposite and V<sub>2</sub>O<sub>5</sub> microsphere electrode at a scan rate of 0.1 mV s<sup>-1</sup>

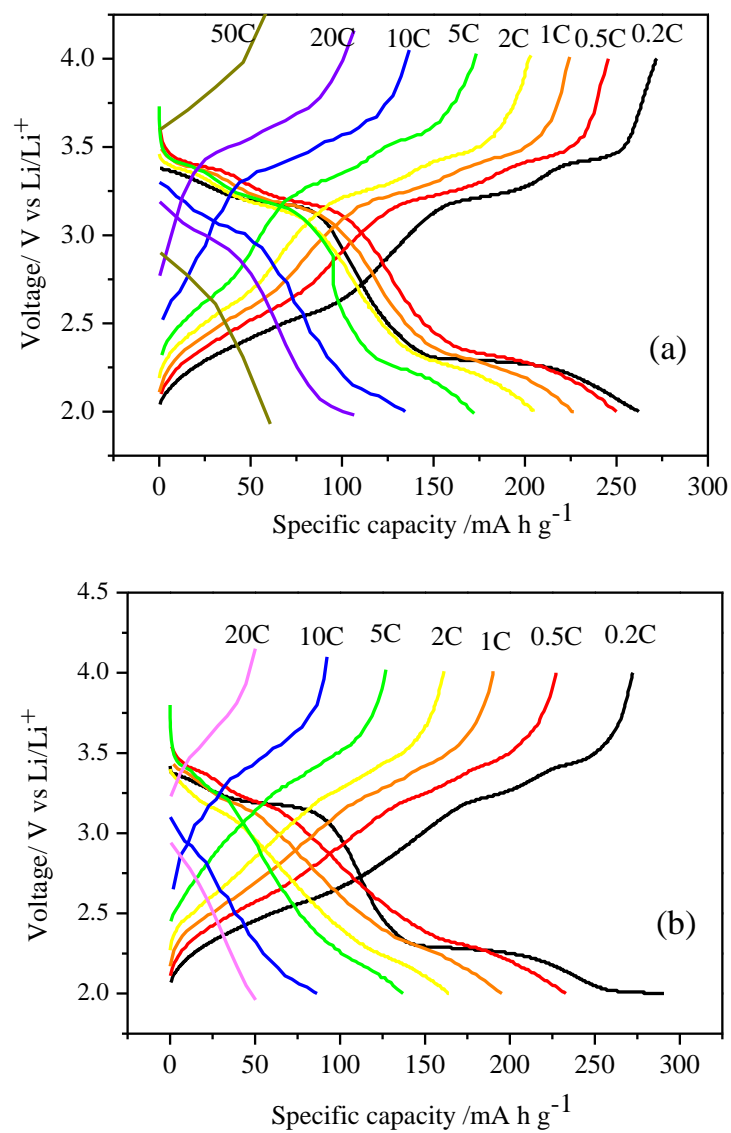

Fig.S8 Charge/discharge profiles of  $V_2O_5$  nanosheets/RGO nanocomposite electrode (a) and  $V_2O_5$  microsphere electrode (b) at different current rates.

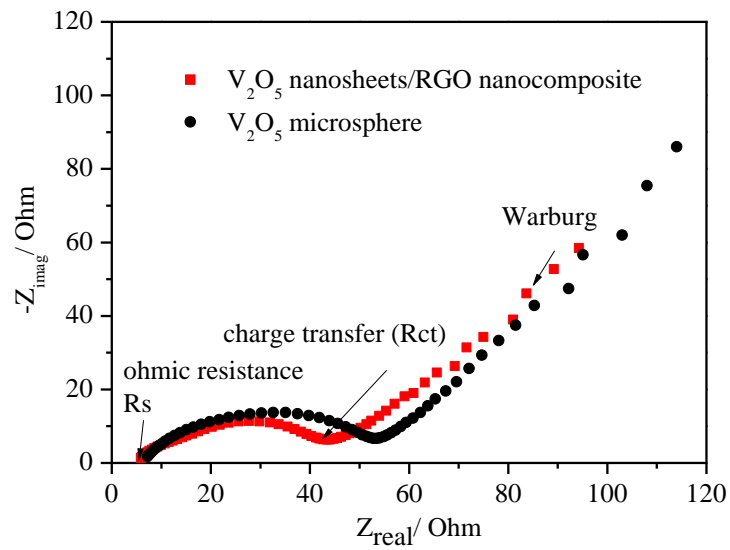

Fig. S9 Nyquist plots of the  $V_2O_5$  nanosheets/RGO nanocomposite electrode and  $V_2O_5$  microsphere electrodes after 5 charge/discharge cycles.
